# Supplementary material for: Improving cardiometabolic and mental health in women with gestational diabetes mellitus and their offspring: study protocol for MySweetHeart Trial, a randomised controlled trial
Source: PubMed Central journal article supplement — BMJ Open. 2018 Feb 27;8(2):e020462. doi: 10.1136/bmjopen-2017-020462 (PMC5855393; doi:10.1136/bmjopen-2017-020462), 2018-02-27
Supplement: bmjopen-2017-020462.reviewer_comments.pdf [file bmjopen-2017-020462.reviewer_comments.pdf]

## PEER REVIEW HISTORY

BMJ Open publishes all reviews undertaken for accepted manuscripts. Reviewers are asked to complete a checklist review form (<http://bmjopen.bmj.com/site/about/resources/checklist.pdf>) and are provided with free text boxes to elaborate on their assessment. These free text comments are reproduced below.

## ARTICLE DETAILS

|                            |                                                                                                                                                                                    |
|----------------------------|------------------------------------------------------------------------------------------------------------------------------------------------------------------------------------|
| <b>TITLE (PROVISIONAL)</b> | Improving cardio-metabolic and mental health in women with gestational diabetes mellitus and their offspring: Study protocol for MySweetHeart Trial, a randomized controlled trial |
| <b>AUTHORS</b>             | Horsch, Antje; Gilbert, Leah; Lanzi, Stefano; Gross, Justine; Kayser, Bengt; Vial, Yvan; Simeoni, Umberto; Hans, Didier; Berney, Alexandre; Scholz, Urte; Barakat, R; Puder, J     |

This article was not externally reviewed at BMJ Open. Protocols that have been independently assessed prior to submission to BMJ Open are usually fast-tracked to publication on the grounds that further substantial changes will not be possible. This independent assessment will usually be external, independent review for both a substantial grant award from a non-commercial or government funder and ethics approval.
